# Supplementary material
Source: PubMed Central journal article supplement (PMC4512137)
Supplement: supp_dc15-0186v150186_DC150186SupplementaryData.pdf [file supp_dc15-0186v150186_DC150186SupplementaryData.pdf]

SUPPLEMENTARY DATA

**Supplementary Table 1.** Study design, numbers of participants with average sleep duration and change in sleep duration information, numbers eligible and numbers of outcomes

| <b>Exposure and outcomes</b>                                              | <b>Cycle 1*</b>  | <b>Cycle 2</b>   | <b>Cycle 3</b>   | <b>Cycle 4</b>    | <b>Total†</b> |
|---------------------------------------------------------------------------|------------------|------------------|------------------|-------------------|---------------|
| <u>Exposure period</u>                                                    | 1985-8 to 1991-4 | 1991-4 to 1997-9 | 1997-9 to 2002-4 | 2002-4 to 2007-9  |               |
| All participants                                                          | 8815             | 7870             | 6968             | 6761              | 30414         |
| Average sleep duration and change in sleep duration information available | 8262             | 6760             | 6151             | 6054              | 27227         |
| As above, but excluding those with missing values in covariates           | 7824             | 5168             | 4719             | 5533              | 23244         |
| <u>Outcome follow-up period</u>                                           | 1991-4 to 1997-9 | 1997-9 to 2002-4 | 2002-4 to 2007-9 | 2007-9 to 2012-13 |               |
| <u>Diabetes outcomes</u>                                                  |                  |                  |                  |                   |               |
| Using fasting glucose definition:-                                        |                  |                  |                  |                   |               |
| Non diabetics at beginning of period                                      | 5613             | 4193             | 3840             | 4195              | 17841         |
| Incident Type 2 diabetes during period, N (%)                             | 137 (2.4)        | 149 (3.6)        | 163 (4.2)        | 125 (3.0)         | 574           |
| Using OGTT definition:-                                                   |                  |                  |                  |                   |               |
| Non diabetics at beginning of period                                      | 5545             | 4117             | 3773             | -                 | 13435         |
| Incident Type 2 diabetes during period, N (%)                             | 188 (3.4)        | 176 (4.3)        | 223 (5.9)        |                   | 587           |
| Using HbA1c definition:-                                                  |                  |                  |                  |                   |               |
| Non diabetics at beginning of period                                      | -                | -                | 3941             | 4240              | 8181          |
| Incident Type 2 diabetes during period, N (%)                             |                  |                  | 247 (6.3)        | 154 (3.6)         | 401           |
| Using all glycemic data‡ definition:-                                     |                  |                  |                  |                   |               |
| Non diabetics at beginning of period                                      | 5545             | 4117             | 3878             | 4238              | 17778         |
| Incident Type 2 diabetes during period, N (%)                             | 188 (3.4)        | 176 (4.3)        | 290 (7.5)        | 162 (3.8)         | 816           |

\* Cycle 1 – average sleep duration and change in sleep duration over the exposure period, years 1985/8 to 1991/4, and incident diabetes over the outcome follow-up period, 1991/4 to 1997/9

† Total person-observations and numbers of incident cases of type 2 diabetes across all available cycles.

‡ Uses OGTT criteria for cycles 1 and 2, combined OGTT and HbA1c definitions for cycle 3 and combined fasting glucose and HbA1c definitions for cycle 4

SUPPLEMENTARY DATA

**Supplementary Table 2.** Association between average sleep duration and change in sleep duration and subsequent incident diabetes, defined using fasting glucose, using four data cycles\*

| Sleep duration                                                      |                       |                             | Adjustments              |                          |                                          |                                                                                                   |
|---------------------------------------------------------------------|-----------------------|-----------------------------|--------------------------|--------------------------|------------------------------------------|---------------------------------------------------------------------------------------------------|
|                                                                     |                       |                             | Age, sex                 | Age, sex, ethnic group   | Age, sex, ethnic group, employment grade | Age, sex, ethnic group, employment grade and BMI at the beginning and end of each exposure period |
|                                                                     | No. events<br>(n=574) | N <sup>†</sup><br>(N=17841) | OR (95% CI)              | OR (95% CI)              | OR (95% CI)                              | OR (95% CI)                                                                                       |
| Average sleep duration among those with no change in sleep duration |                       |                             |                          |                          |                                          |                                                                                                   |
| ≤ 5.5 hours                                                         | 65                    | 1299                        | 1.82 (1.34, 2.47)        | 1.60 (1.17, 2.18)        | 1.52 (1.11, 2.07)                        | 1.38 (1.00, 1.89)                                                                                 |
| 6.0 - 6.5 hours                                                     | 179                   | 5985                        | 1.10 (0.87, 1.38)        | 1.07 (0.85, 1.34)        | 1.05 (0.83, 1.32)                        | 0.96 (0.76, 1.21)                                                                                 |
| 7 hours                                                             | 130                   | 4893                        | 1.00 (ref <sup>‡</sup> ) | 1.00 (ref <sup>‡</sup> ) | 1.00 (ref <sup>‡</sup> )                 | 1.00 (ref <sup>‡</sup> )                                                                          |
| 7.5 - 8.0 hours                                                     | 132                   | 4201                        | 1.16 (0.91, 1.48)        | 1.13 (0.88, 1.45)        | 1.13 (0.88, 1.44)                        | 1.13 (0.88, 1.45)                                                                                 |
| ≥ 8.5 hours                                                         | 16                    | 362                         | 1.58 (0.93, 2.69)        | 1.41 (0.83, 2.41)        | 1.43 (0.84, 2.44)                        | 1.29 (0.75, 2.22)                                                                                 |
| P-value for quadratic model                                         |                       |                             | 0.006                    | 0.050                    | 0.097                                    | 0.27                                                                                              |
| Change in sleep duration                                            |                       |                             |                          |                          |                                          |                                                                                                   |
| ≥2 hours decrease in sleep                                          | 26                    | 537                         | 1.70 (1.10, 2.64)        | 1.44 (0.92, 2.23)        | 1.42 (0.91, 2.20)                        | 1.31 (0.83, 2.06)                                                                                 |
| ≥2 hours increase in sleep                                          | 26                    | 564                         | 1.87 (1.21, 2.88)        | 1.73 (1.12, 2.67)        | 1.69 (1.09, 2.62)                        | 1.51 (0.97, 2.37)                                                                                 |

\* 6473 participants contributed to these analyses with 24%, 21%, 10% and 45% having 1, 2, 3 and 4 cycles of data respectively

<sup>†</sup> Number of person-observations

<sup>‡</sup> Odds ratios compared to those who had 7 hours sleep on both occasions

SUPPLEMENTARY DATA

**Supplementary Table 3.** Association between average sleep duration and change in sleep duration and subsequent incident diabetes, defined using the OGTT criteria, using three data cycles\*

| Sleep duration                                                      |                       |                             | Adjustments              |                          |                                          |                                                                                                   |
|---------------------------------------------------------------------|-----------------------|-----------------------------|--------------------------|--------------------------|------------------------------------------|---------------------------------------------------------------------------------------------------|
|                                                                     |                       |                             | Age, sex                 | Age, sex, ethnic group   | Age, sex, ethnic group, employment grade | Age, sex, ethnic group, employment grade and BMI at the beginning and end of each exposure period |
|                                                                     | No. events<br>(n=587) | N <sup>†</sup><br>(N=13435) | OR (95% CI)              | OR (95% CI)              | OR (95% CI)                              | OR (95% CI)                                                                                       |
| Average sleep duration among those with no change in sleep duration |                       |                             |                          |                          |                                          |                                                                                                   |
| ≤ 5.5 hours                                                         | 62                    | 897                         | 1.51 (1.11, 2.05)        | 1.35 (0.99, 1.84)        | 1.28 (0.94, 1.75)                        | 1.21 (0.88, 1.65)                                                                                 |
| 6.0 - 6.5 hours                                                     | 166                   | 4418                        | 0.84 (0.67, 1.05)        | 0.82 (0.66, 1.03)        | 0.80 (0.64, 1.01)                        | 0.75 (0.60, 0.94)                                                                                 |
| 7 hours                                                             | 159                   | 3736                        | 1.00 (ref <sup>‡</sup> ) | 1.00 (ref <sup>‡</sup> ) | 1.00 (ref <sup>‡</sup> )                 | 1.00 (ref <sup>‡</sup> )                                                                          |
| 7.5 - 8.0 hours                                                     | 135                   | 3239                        | 0.95 (0.75, 1.20)        | 0.93 (0.74, 1.18)        | 0.93 (0.73, 1.18)                        | 0.93 (0.73, 1.18)                                                                                 |
| ≥ 8.5 hours                                                         | 14                    | 260                         | 1.16 (0.66, 2.05)        | 1.08 (0.61, 1.90)        | 1.08 (0.61, 1.91)                        | 0.99 (0.56, 1.76)                                                                                 |
| P-value for quadratic model                                         |                       |                             | 0.027                    | 0.12                     | 0.21                                     | 0.43                                                                                              |
| Change in sleep duration                                            |                       |                             |                          |                          |                                          |                                                                                                   |
| ≥2 hours decrease in sleep                                          | 22                    | 464                         | 1.08 (0.68, 1.72)        | 0.95 (0.59, 1.51)        | 0.93 (0.58, 1.48)                        | 0.86 (0.54, 1.38)                                                                                 |
| ≥2 hours increase in sleep                                          | 29                    | 421                         | 1.68 (1.11, 2.54)        | 1.58 (1.04, 2.39)        | 1.54 (1.01, 2.34)                        | 1.43 (0.94, 2.19)                                                                                 |

\* 5996 participants contributed to these analyses with 31%, 13% and 56% having 1, 2 and 3 cycles of data respectively

<sup>†</sup> Number of person-observations

<sup>‡</sup> Odds ratios compared to those who had 7 hours sleep on both occasions

SUPPLEMENTARY DATA

**Supplementary Table 4.** Association between average sleep duration and change in sleep duration and subsequent incident diabetes, defined using HbA1<sub>c</sub>, using two data cycles\*

| Sleep duration                                                      |                       |                            | Adjustments              |                          |                                          |                                                                                                   |
|---------------------------------------------------------------------|-----------------------|----------------------------|--------------------------|--------------------------|------------------------------------------|---------------------------------------------------------------------------------------------------|
|                                                                     |                       |                            | Age, sex                 | Age, sex, ethnic group   | Age, sex, ethnic group, employment grade | Age, sex, ethnic group, employment grade and BMI at the beginning and end of each exposure period |
|                                                                     | No. events<br>(n=401) | N <sup>†</sup><br>(N=8181) | OR (95% CI)              | OR (95% CI)              | OR (95% CI)                              | OR (95% CI)                                                                                       |
| Average sleep duration among those with no change in sleep duration |                       |                            |                          |                          |                                          |                                                                                                   |
| ≤ 5.5 hours                                                         | 47                    | 764                        | 1.80 (1.24, 2.62)        | 1.58 (1.08, 2.32)        | 1.51 (1.03, 2.21)                        | 1.36 (0.92, 2.00)                                                                                 |
| 6.0 - 6.5 hours                                                     | 150                   | 3024                       | 1.41 (1.07, 1.87)        | 1.36 (1.03, 1.81)        | 1.35 (1.01, 1.78)                        | 1.28 (0.96, 1.71)                                                                                 |
| 7 hours                                                             | 78                    | 2157                       | 1.00 (ref <sup>‡</sup> ) | 1.00 (ref <sup>‡</sup> ) | 1.00 (ref <sup>‡</sup> )                 | 1.00 (ref <sup>‡</sup> )                                                                          |
| 7.5 - 8.0 hours                                                     | 88                    | 1685                       | 1.42 (1.04, 1.95)        | 1.39 (1.02, 1.91)        | 1.40 (1.02, 1.92)                        | 1.42 (1.03, 1.96)                                                                                 |
| ≥ 8.5 hours                                                         | 10                    | 176                        | 1.53 (0.78, 3.02)        | 1.38 (0.69, 2.74)        | 1.40 (0.71, 2.79)                        | 1.35 (0.68, 2.70)                                                                                 |
| P-value for quadratic model                                         |                       |                            | 0.058                    | 0.22                     | 0.33                                     | 0.68                                                                                              |
| Change in sleep duration                                            |                       |                            |                          |                          |                                          |                                                                                                   |
| ≥2 hours decrease in sleep                                          | 12                    | 152                        | 2.18 (1.16, 4.12)        | 1.87 (0.98, 3.56)        | 1.87 (0.98, 3.56)                        | 1.81 (0.93, 3.53)                                                                                 |
| ≥2 hours increase in sleep                                          | 16                    | 223                        | 2.24 (1.28, 3.92)        | 1.99 (1.13, 3.53)        | 1.95 (1.11, 3.46)                        | 1.76 (0.99, 3.15)                                                                                 |

\* 4923 participants contributed to these analyses with 34% and 66% having 1 and 2 cycles of data respectively

<sup>†</sup> Number of person-observations

<sup>‡</sup> Odds ratios compared to those who had 7 hours sleep on both occasions

SUPPLEMENTARY DATA

**Supplementary Table 5.** Age and sex adjusted associations between average sleep duration and change in sleep duration and subsequent incident diabetes among all participants, including those with missing data on the other covariates controlled for in the main analyses

| Sleep duration                                                      | Definition of incident diabetes                                                               |                                                                         |                                                                                 |                                                               |
|---------------------------------------------------------------------|-----------------------------------------------------------------------------------------------|-------------------------------------------------------------------------|---------------------------------------------------------------------------------|---------------------------------------------------------------|
|                                                                     | Participant report of doctor-diagnosed diabetes or diabetes defined using all glycemic data * | Participant report of doctor-diagnosed diabetes or high fasting glucose | Participant report of doctor-diagnosed diabetes or high 2-hour postload glucose | Participant report of doctor-diagnosed diabetes or high HbA1c |
|                                                                     | OR (95% CI)                                                                                   | OR (95% CI)                                                             | OR (95% CI)                                                                     | OR (95% CI)                                                   |
| No. incident diabetes events                                        | 921                                                                                           | 638                                                                     | 676                                                                             | 458                                                           |
| Number of person-observations                                       | 19434                                                                                         | 19513                                                                   | 14984                                                                           | 9114                                                          |
| Average sleep duration among those with no change in sleep duration |                                                                                               |                                                                         |                                                                                 |                                                               |
| ≤ 5.5 hours                                                         | 1.52 (1.19, 1.95)                                                                             | 1.80 (1.34, 2.42)                                                       | 1.47 (1.10, 1.96)                                                               | 1.61 (1.13, 2.29)                                             |
| 6.0 - 6.5 hours                                                     | 0.99 (0.83, 1.19)                                                                             | 1.10 (0.88, 1.37)                                                       | 0.87 (0.70, 1.07)                                                               | 1.33 (1.03, 1.73)                                             |
| 7 hours                                                             | 1.00 (ref <sup>†</sup> )                                                                      | 1.00 (ref <sup>†</sup> )                                                | 1.00 (ref <sup>†</sup> )                                                        | 1.00 (ref <sup>†</sup> )                                      |
| 7.5 - 8.0 hours                                                     | 1.01 (0.83, 1.23)                                                                             | 1.23 (0.97, 1.55)                                                       | 0.98 (0.79, 1.23)                                                               | 1.37 (1.03, 1.83)                                             |
| ≥ 8.5 hours                                                         | 1.29 (0.83, 1.99)                                                                             | 1.59 (0.96, 2.64)                                                       | 1.37 (0.84, 2.24)                                                               | 1.48 (0.80, 2.76)                                             |
| P-value for quadratic model                                         | 0.002                                                                                         | 0.005                                                                   | 0.017                                                                           | 0.14                                                          |
| Change in sleep duration                                            |                                                                                               |                                                                         |                                                                                 |                                                               |
| ≥2 hours decrease in sleep                                          | 1.52 (1.07, 2.18)                                                                             | 1.73 (1.15, 2.60)                                                       | 1.25 (0.83, 1.88)                                                               | 1.94 (1.06, 3.56)                                             |
| ≥2 hours increase in sleep                                          | 1.74 (1.24, 2.45)                                                                             | 1.84 (1.21, 2.79)                                                       | 1.47 (1.10, 1.96)                                                               | 1.89 (1.11, 3.23)                                             |

\* Odds ratios compared to those who had no change in sleep duration and had an average 7 hours sleep

† Uses OGTT criteria for cycles 1 and 2, combined OGTT and HbA1c definitions for cycle 3 and combined fasting glucose and HbA1c definitions for cycle 4
